# Supplementary material
Source: PubMed Central journal article supplement (PMC153020)

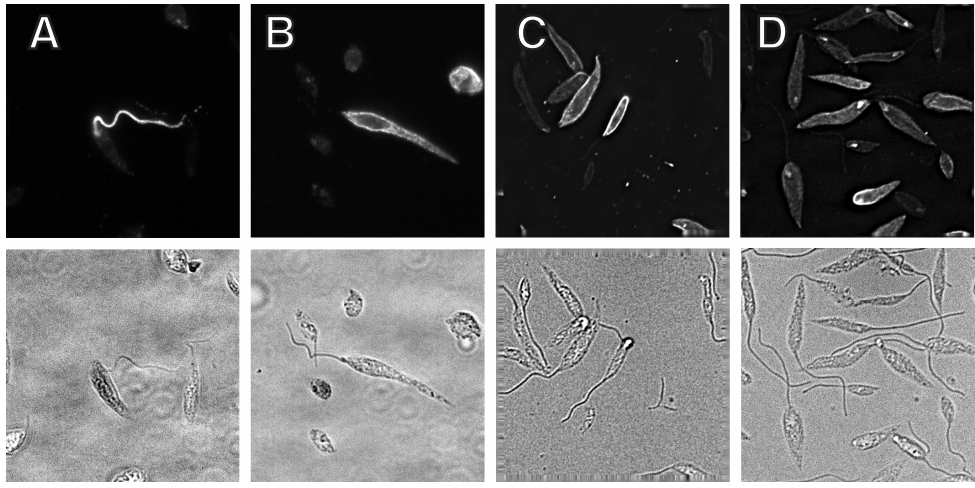

Supplement: pnas_0630165100_2.pdf [file pnas_0630165100_2.pdf]
